# Supplementary material for: Phosphorescent Ir(iii) complexes bearing double benzyldiphenylphosphine cyclometalates; strategic synthesis, fundamental and integration for white OLED fabrication
Source: Royal Society of Chemistry journal article supplement (doi:10.1039/c0jm00653j), 2010-01-01
Supplement: c0jm00653j.pdf [file c0jm00653j.pdf]

## Supporting Information

### **Phosphorescent Ir(III) Complexes Bearing Double Benzyldiphenylphosphine Cyclometalates; Strategic Synthesis, Fundamental and Integration for White OLED Fabrication**

Jui-Yi Hung,<sup>a</sup> Chen-Huey Lin,<sup>a</sup> Yun Chi,<sup>\*,a</sup> Min-Wen Chung,<sup>b</sup> Yi-Ju Chen,<sup>b</sup> Gene-Hsiang Lee,<sup>b</sup> Pi-Tai Chou,<sup>\*,b</sup> Chung-Chia Chen,<sup>c</sup> and Chung-Chih Wu,<sup>\*,c</sup>

<sup>a</sup> Department of Chemistry, National Tsing Hua University, Hsinchu 300, Taiwan;  
E-mail: [ychi@mx.nthu.edu.tw](mailto:ychi@mx.nthu.edu.tw)

<sup>b</sup> Department of Chemistry, National Taiwan University, Taipei 106, Taiwan; E-mail:  
[chop@ntu.edu.tw](mailto:chop@ntu.edu.tw)

<sup>c</sup> Department of Electrical Engineering, National Taiwan University, Taipei 106, Taiwan; E-mail: [chungwu@cc.ee.ntu.edu.tw](mailto:chungwu@cc.ee.ntu.edu.tw)

[\*\*] This work was supported by the National Science Council and Ministry of Economic Affairs of Taiwan.

| $^3\text{MLCT}$<br>(net spin value located on Ir = 0.155)                          | $^3\text{MC}$<br>(net spin value located on Ir = 1.285)                             |
|------------------------------------------------------------------------------------|-------------------------------------------------------------------------------------|
| SOMO                                                                               | SOMO                                                                                |
| 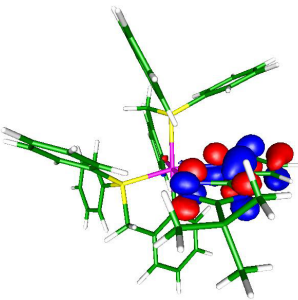  |   |
| SOMO-1                                                                             | SOMO-1                                                                              |
|  |  |

**Figure S1.** The frontier orbital distributions and net spin values located on central metal for  $^3\text{MLCT}$  and  $^3\text{MC}$  state geometries of complex **3**. (The singly occupied molecular orbital (SOMO) for the triplet electronic state is similar to the LUMO of ground state; while SOMO-1 is like HOMO.)

| $^3\text{MLCT}$<br>(net spin value located on Ir = 0.076)                          | $^3\text{MC}$<br>(net spin value located on Ir = 1.295)                             |
|------------------------------------------------------------------------------------|-------------------------------------------------------------------------------------|
| SOMO                                                                               | SOMO                                                                                |
| 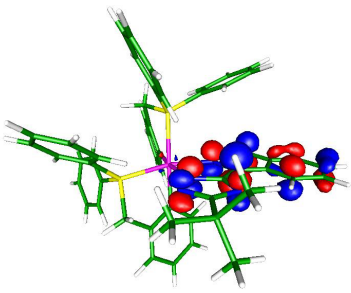  |   |
| SOMO-1                                                                             | SOMO-1                                                                              |
|  |  |

**Figure S2.** The frontier orbital distributions and net spin values located on central metal for  $^3\text{MLCT}$  and  $^3\text{MC}$  state geometries of complex **4**. (The singly occupied molecular orbital (SOMO) for the triplet electronic state is similar to the LUMO of ground state; while SOMO-1 is like HOMO.)

| $^3\text{MLCT}$<br>(net spin value located on Ir = 0.106)                          | $^3\text{MC}$<br>(net spin value located on Ir = 1.316)                             |
|------------------------------------------------------------------------------------|-------------------------------------------------------------------------------------|
| SOMO                                                                               | SOMO                                                                                |
| 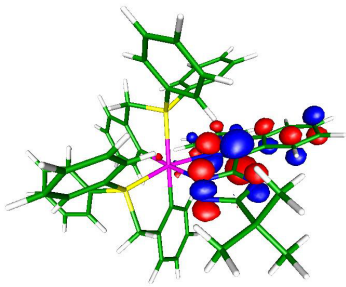  |   |
| SOMO-1                                                                             | SOMO-1                                                                              |
|  |  |

**Figure S3.** The frontier orbital distributions and net spin values located on central metal for  $^3\text{MLCT}$  and  $^3\text{MC}$  state geometries of complex **5**. (The singly occupied molecular orbital (SOMO) for the triplet electronic state is similar to the LUMO of ground state; while SOMO-1 is like HOMO.)

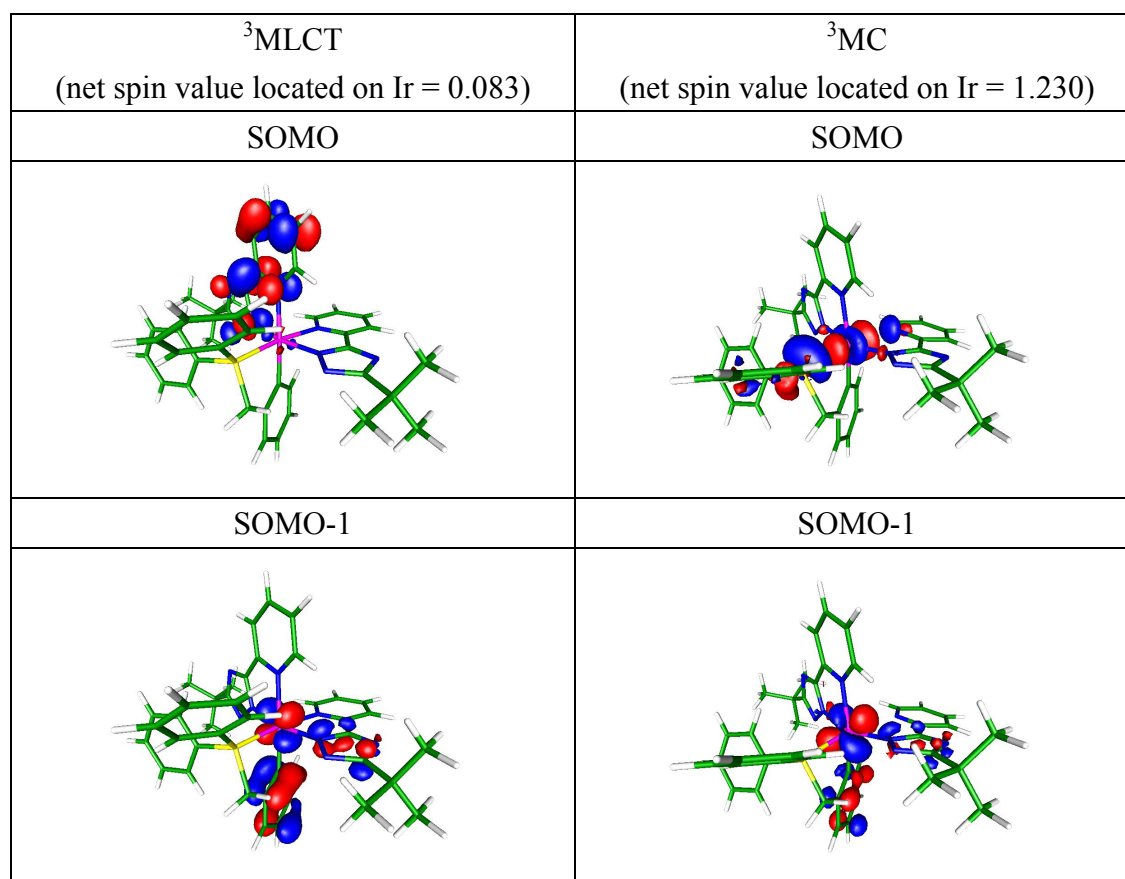

**Figure S4.** The frontier orbital distributions and net spin values located on central metal for  $^3\text{MLCT}$  and  $^3\text{MC}$  state geometries of complex **6**. (The singly occupied molecular orbital (SOMO) for the triplet electronic state is similar to the LUMO of ground state; while SOMO-1 is like HOMO.)

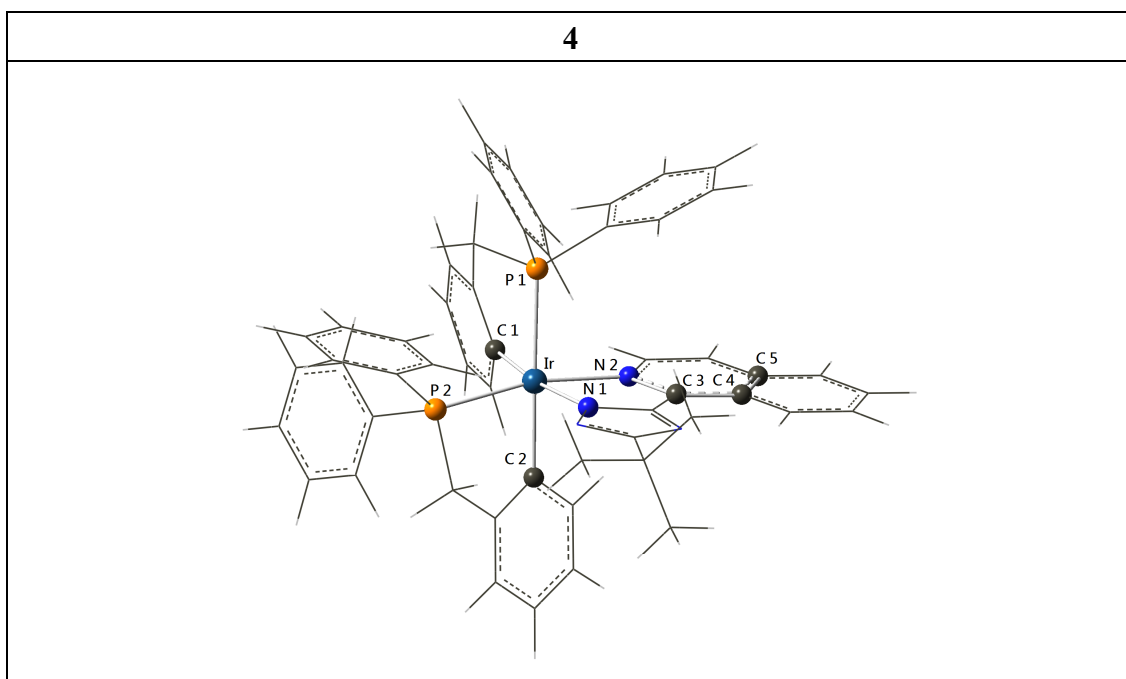

| degree | Dihedral Angle<br>(N <sub>2</sub> -C <sub>3</sub> -C <sub>4</sub> -C <sub>5</sub> ) | Angle<br>(P <sub>1</sub> -Ir-N <sub>2</sub> ) | Angle<br>(P <sub>1</sub> -Ir-N <sub>1</sub> ) | Angle<br>(P <sub>1</sub> -Ir-C <sub>1</sub> ) | Angle<br>(P <sub>1</sub> -Ir-P <sub>2</sub> ) |
|--------|-------------------------------------------------------------------------------------|-----------------------------------------------|-----------------------------------------------|-----------------------------------------------|-----------------------------------------------|
|        | 0.89                                                                                | 89.12                                         | 96.75                                         | 80.42                                         | 102.78                                        |

**Figure S5.** Structures and selected geometrical parameters of the lowest triplet state (T<sub>1</sub>) for **4**.

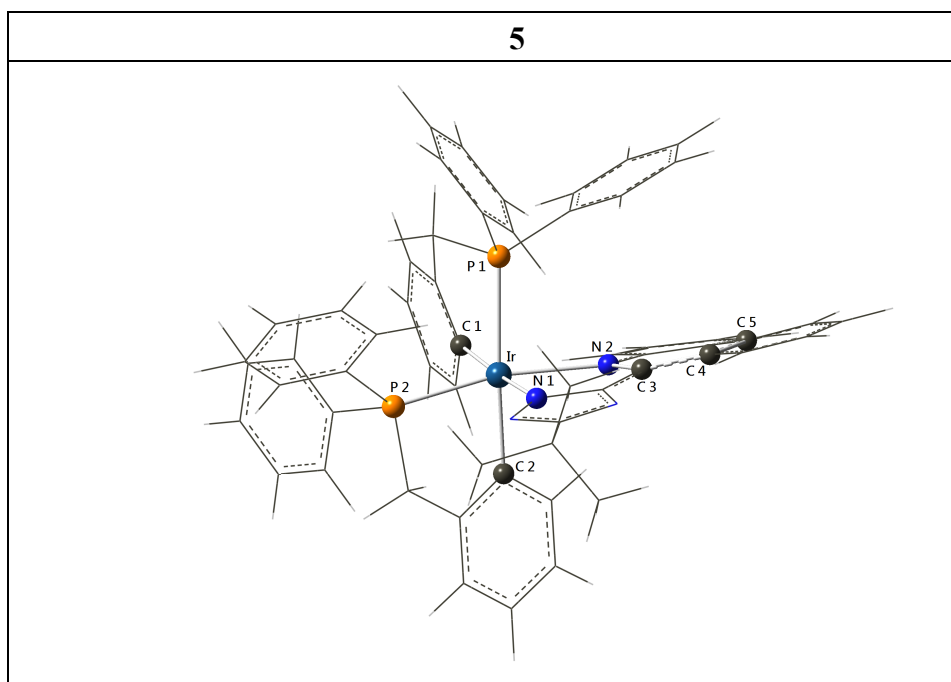

**Figure S6.** Structures and selected geometrical parameters of the lowest triplet state ( $T_1$ ) for **5** respectively.

| degree | Dihedral Angle<br>( $N_2-C_3-C_4-C_5$ ) | Angle<br>( $P_1-Ir-N_2$ ) | Angle<br>( $P_1-Ir-N_1$ ) | Angle<br>( $P_1-Ir-C_1$ ) | Angle<br>( $P_1-Ir-P_2$ ) |
|--------|-----------------------------------------|---------------------------|---------------------------|---------------------------|---------------------------|
|        | -5.63                                   | 85.40                     | 97.17                     | 79.52                     | 104.61                    |
